# Supplementary material for: Efficacy and Safety of Xanomeline-Trospium Chloride in Schizophrenia: A Randomized Clinical Trial
Source: PubMed Central journal article supplement — JAMA Psychiatry. 2024 May 1;81(8):749–56. doi: 10.1001/jamapsychiatry.2024.0785 (PMC11063924; doi:10.1001/jamapsychiatry.2024.0785), 2024-05-01
Supplement: jamapsychiatry-e240785-s003.pdf [file jamapsychiatry-e240785-s003.pdf]

## Data Sharing Statement

Kaul. Efficacy and Safety of Xanomeline-Trospium Chloride in Schizophrenia. *JAMA Psychiatry*. Published May 01, 2024. doi:10.1001/jamapsychiatry.2024.0785

### Data

**Data available:** No
